# Supplementary material for: Assessing decadal to centennial scale nonstationary variability in meteorological drought trends
Source: Copernicus journal article supplement (doi:10.5194/egusphere-2022-476), 2022-08-02
Supplement: Supplementary file [file egusphere-2022-476-AC1-supplement.pdf]

*Supplement of*

**Assessing decadal to centennial scale nonstationary variability in meteorological drought trends**

Sung et al.,

*Correspondence to:* Kyungmin Sung (sung.229@osu.edu)

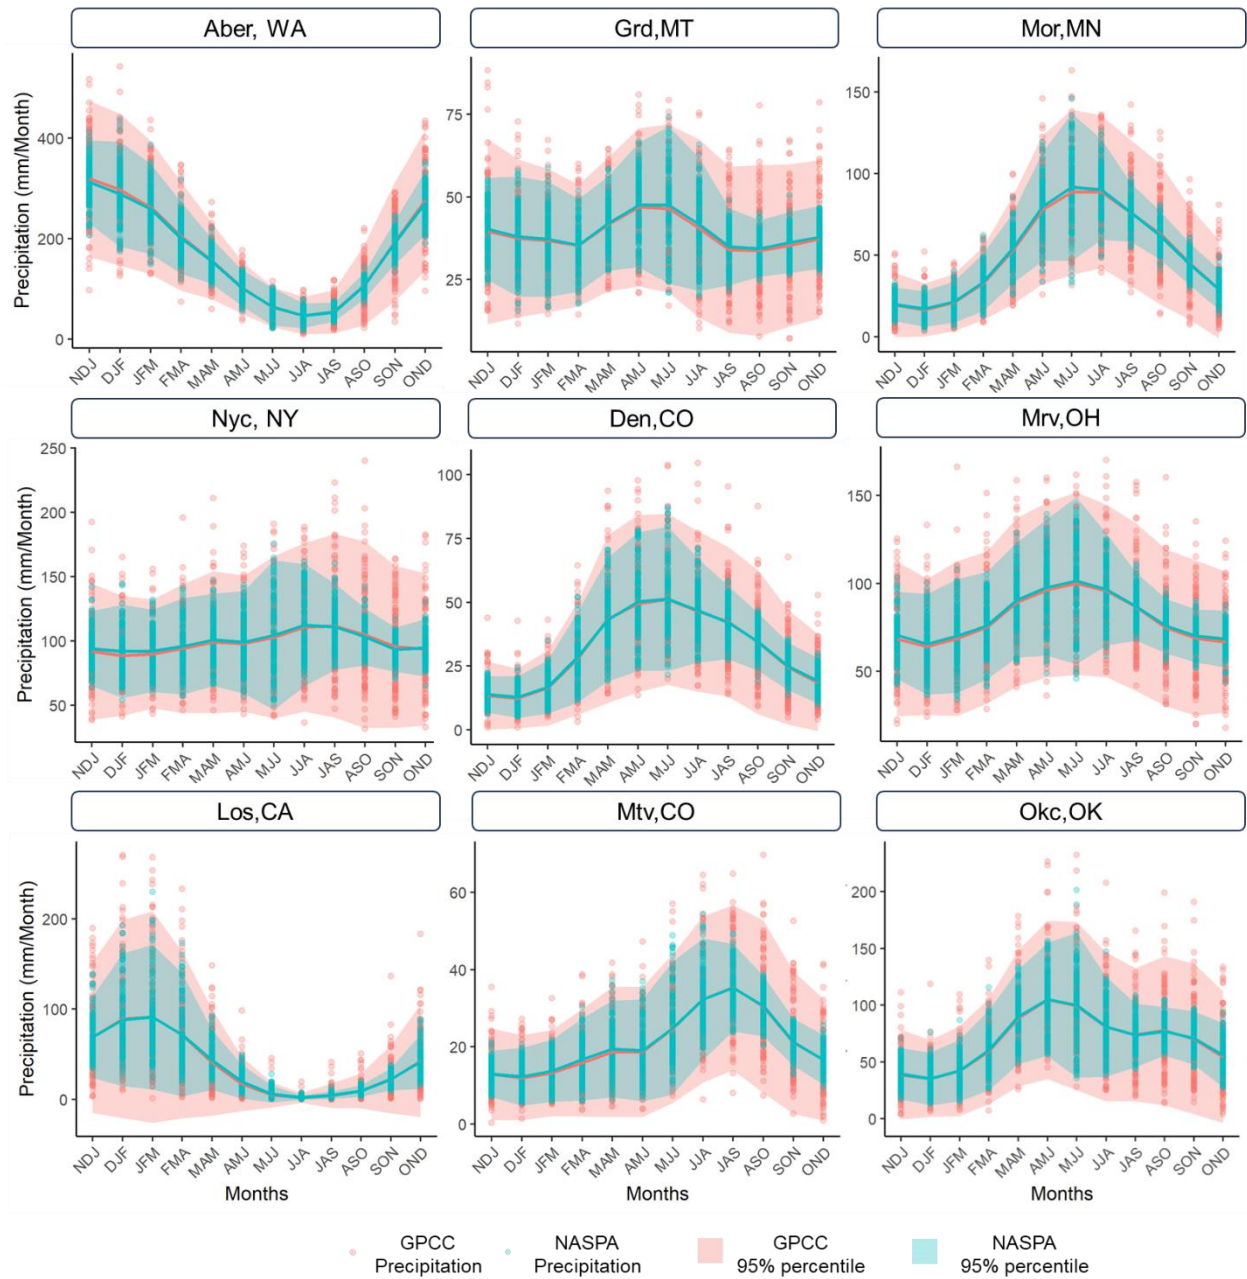

Figure S 1. Compare the distribution of precipitation in GPCC VS 10 nearest neighbors.

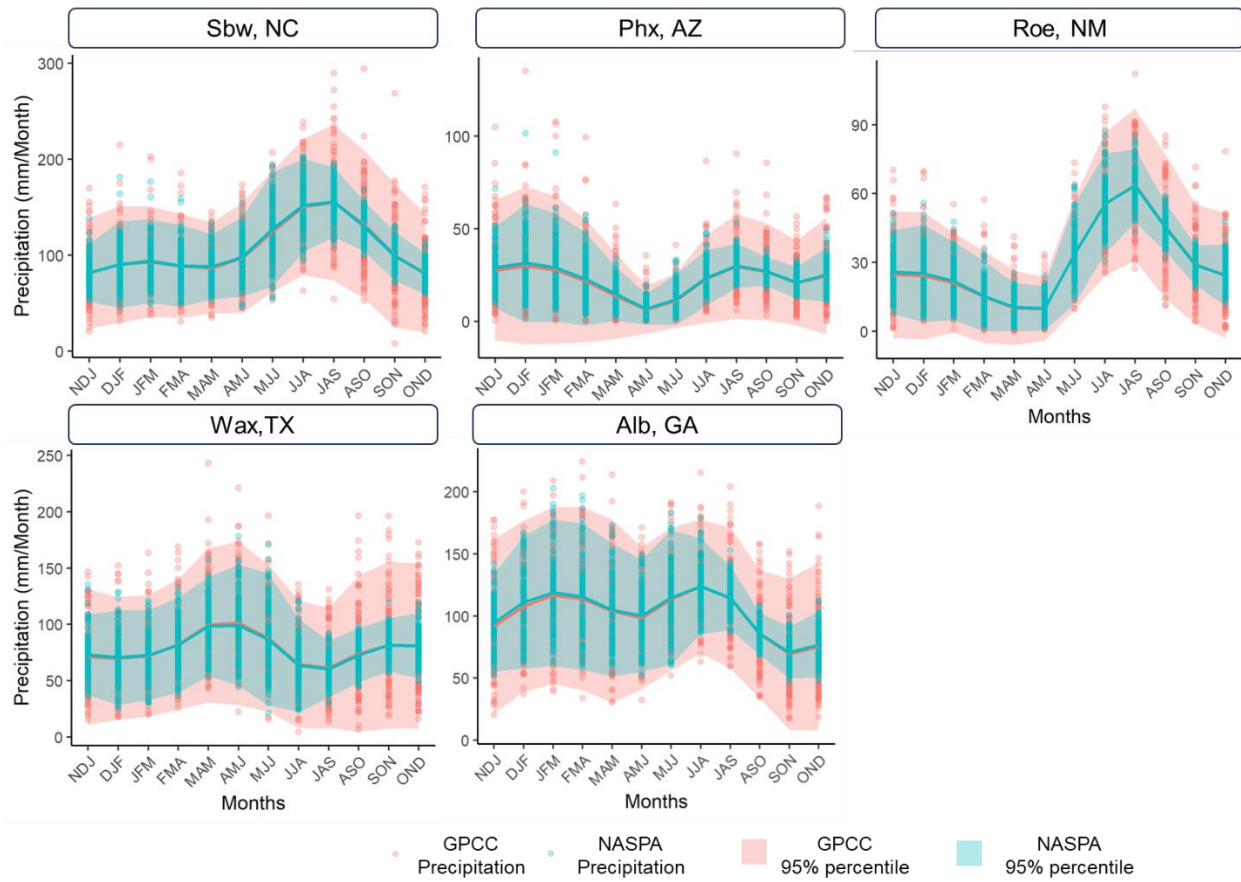

Figure S 1 (Continue). Compare the distribution of precipitation in GPCC VS 10 nearest neighbors.

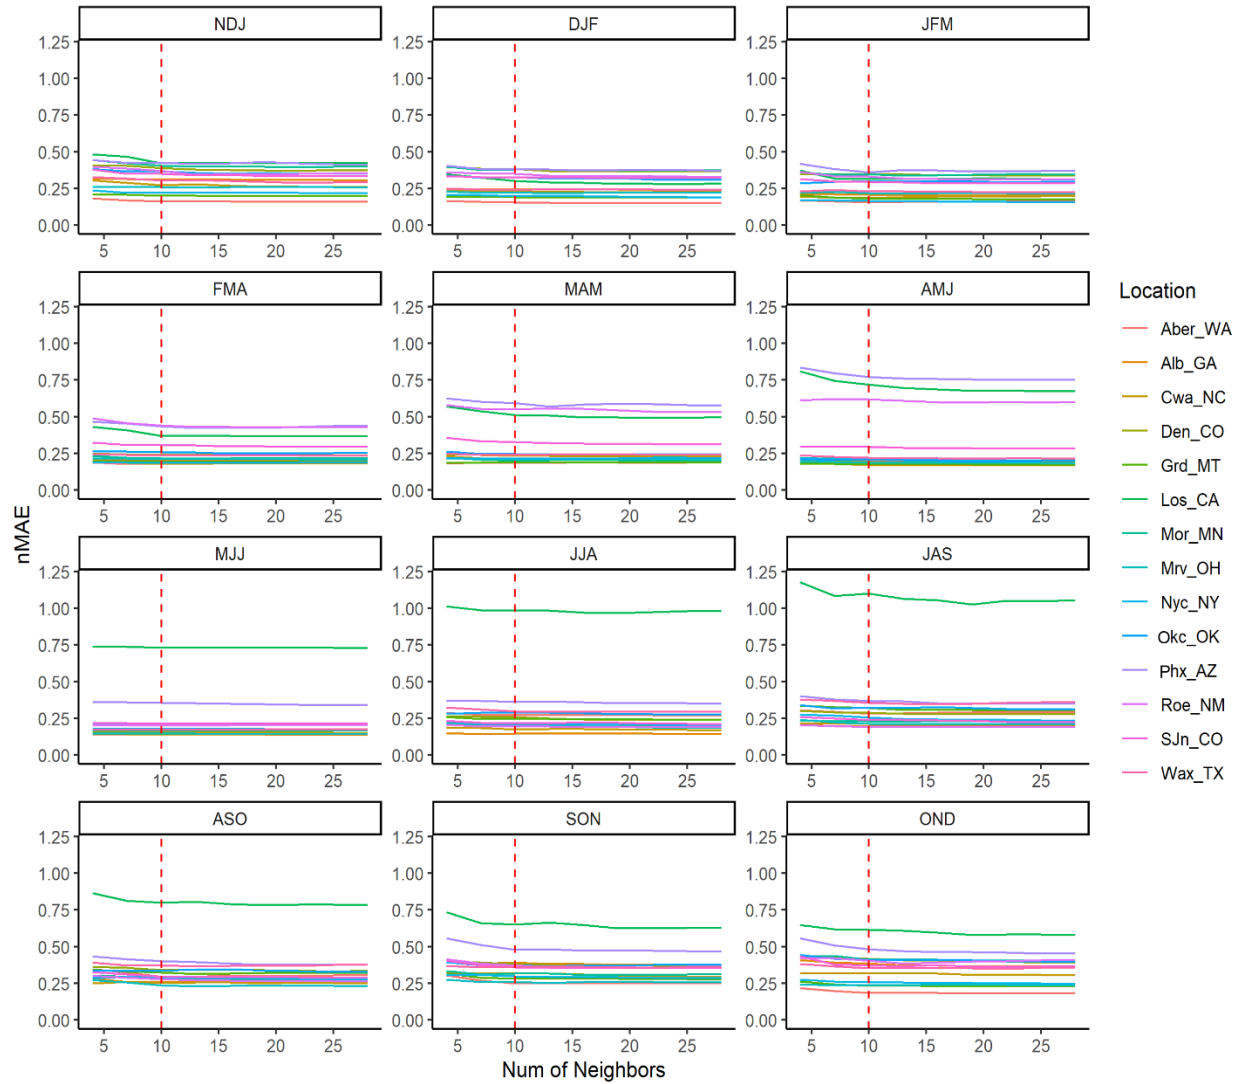

Figure S 2. nMAE (Normalized Mean Absolute Error) of dsNASPA compared to GPCP

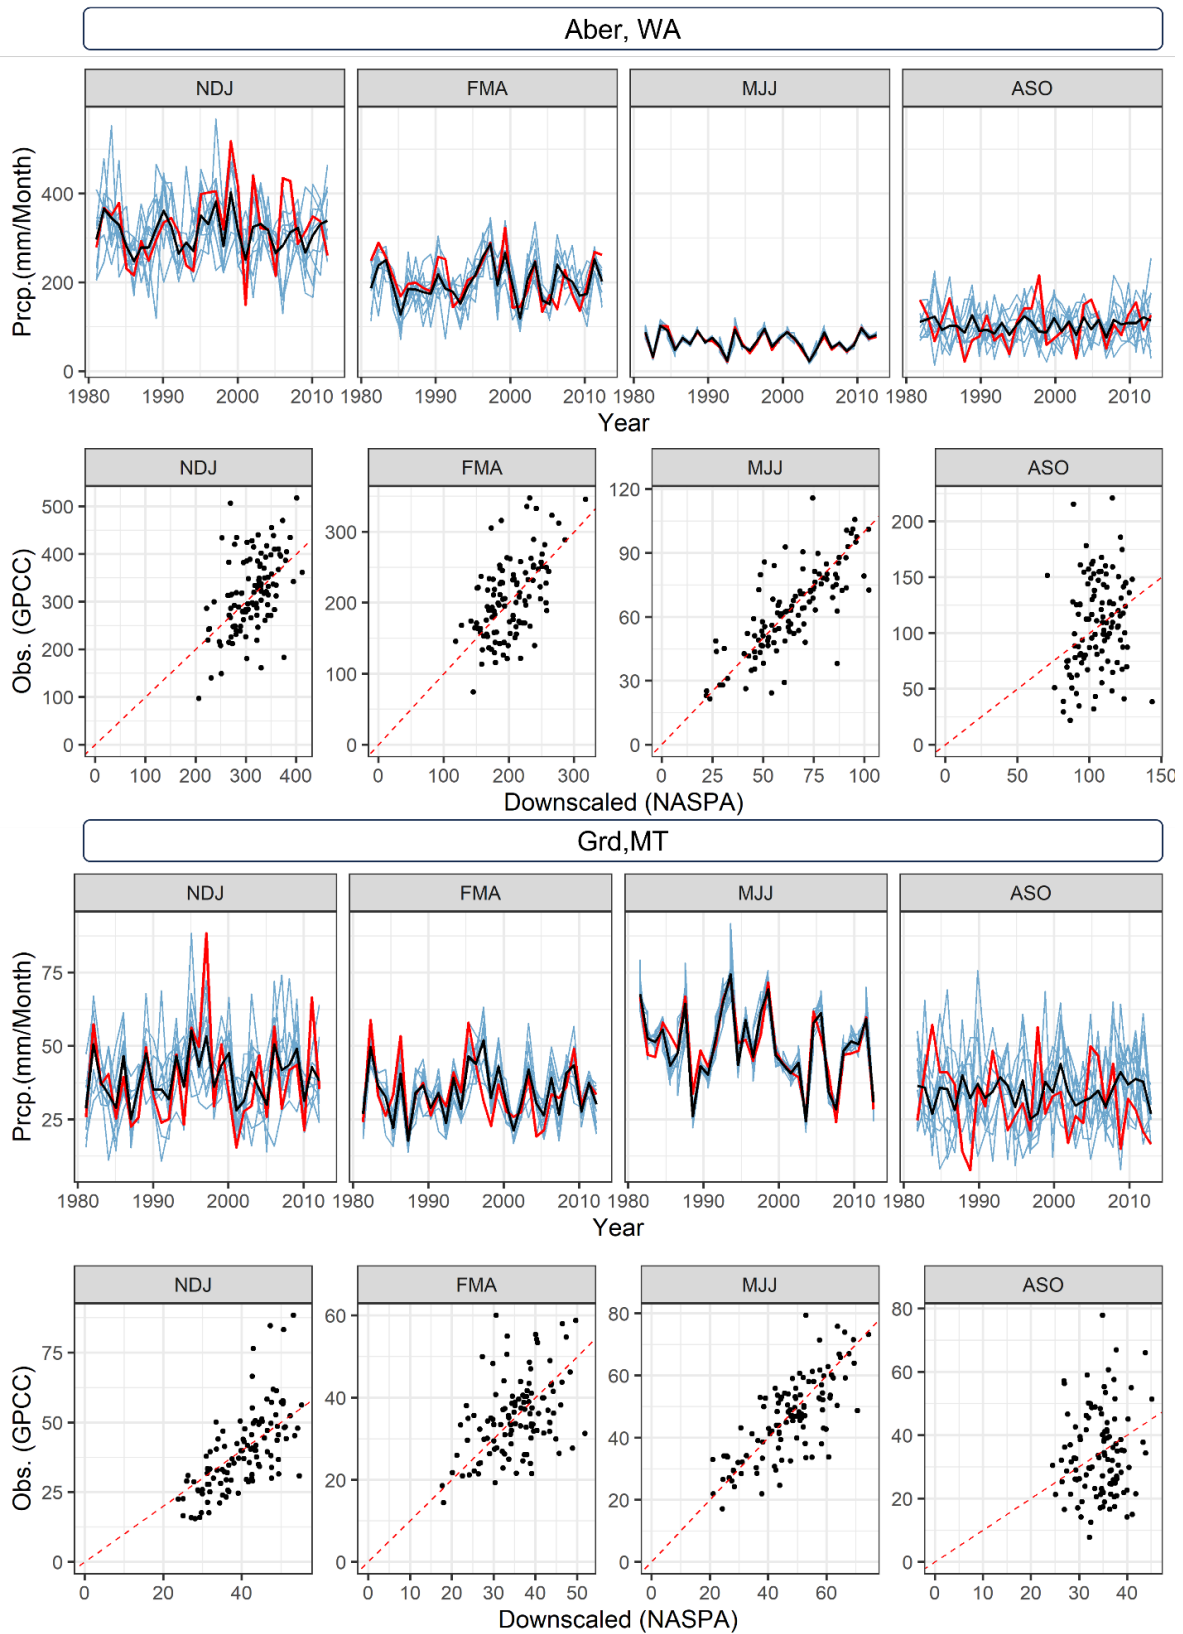

Figure S 3. (upper) Compare the precipitation time series of GPCC (red), downscaled NASPA (black) and its nearest neighbors(sky), (lower) GPCC VS downscaled NASA

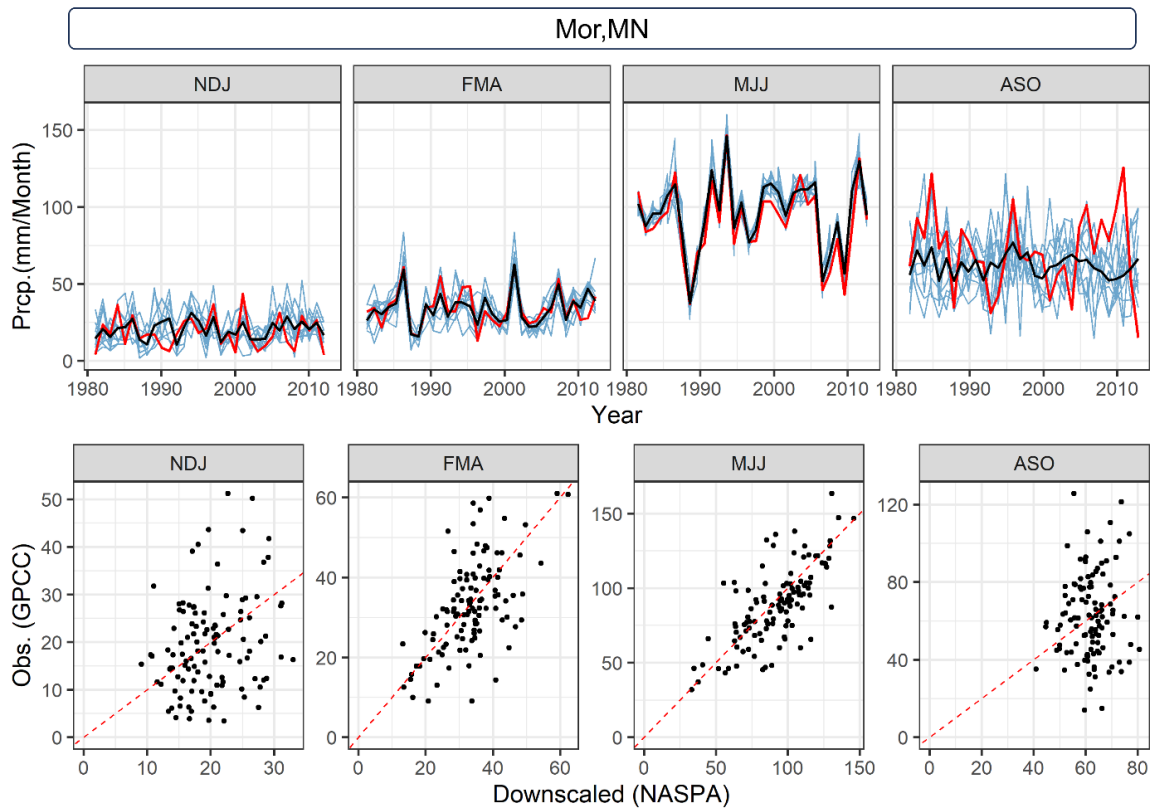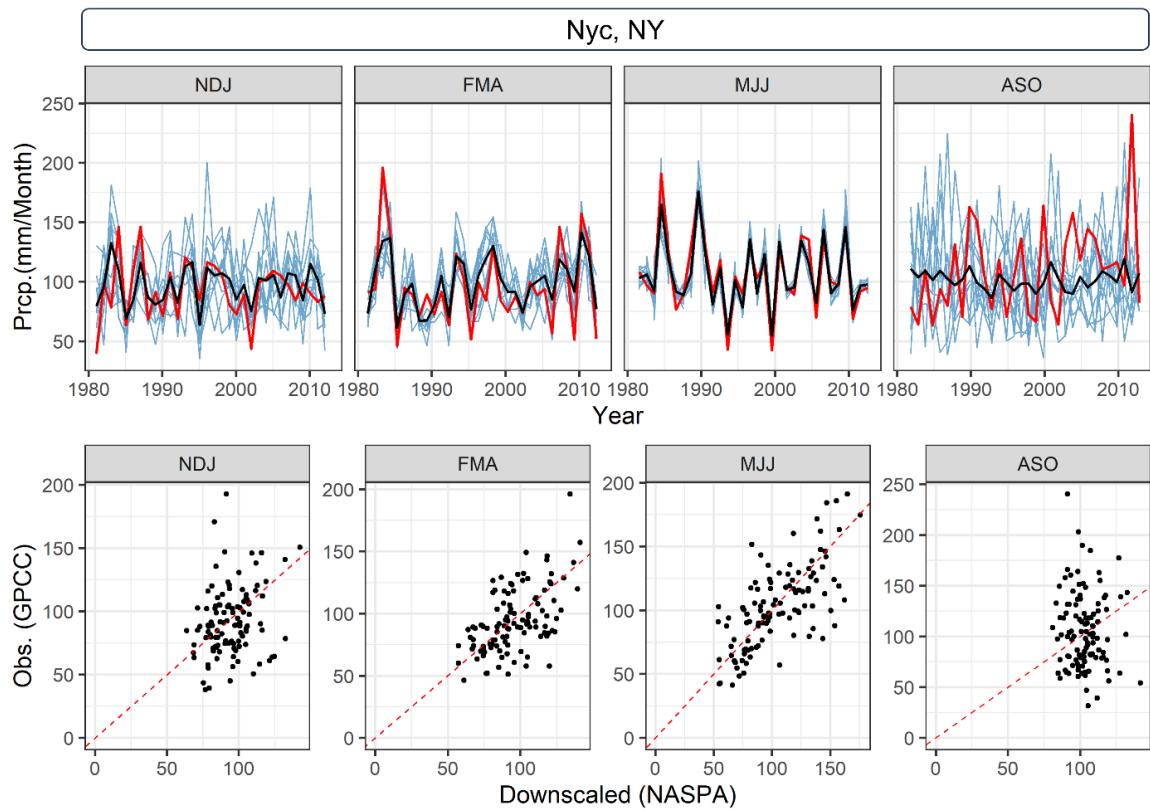

Figure S 4 (Continue). (upper) Compare the precipitation time series of GPCC (red), downscaled NASPA (black) and its nearest neighbors (sky), (lower) GPCC VS downscaled NASA

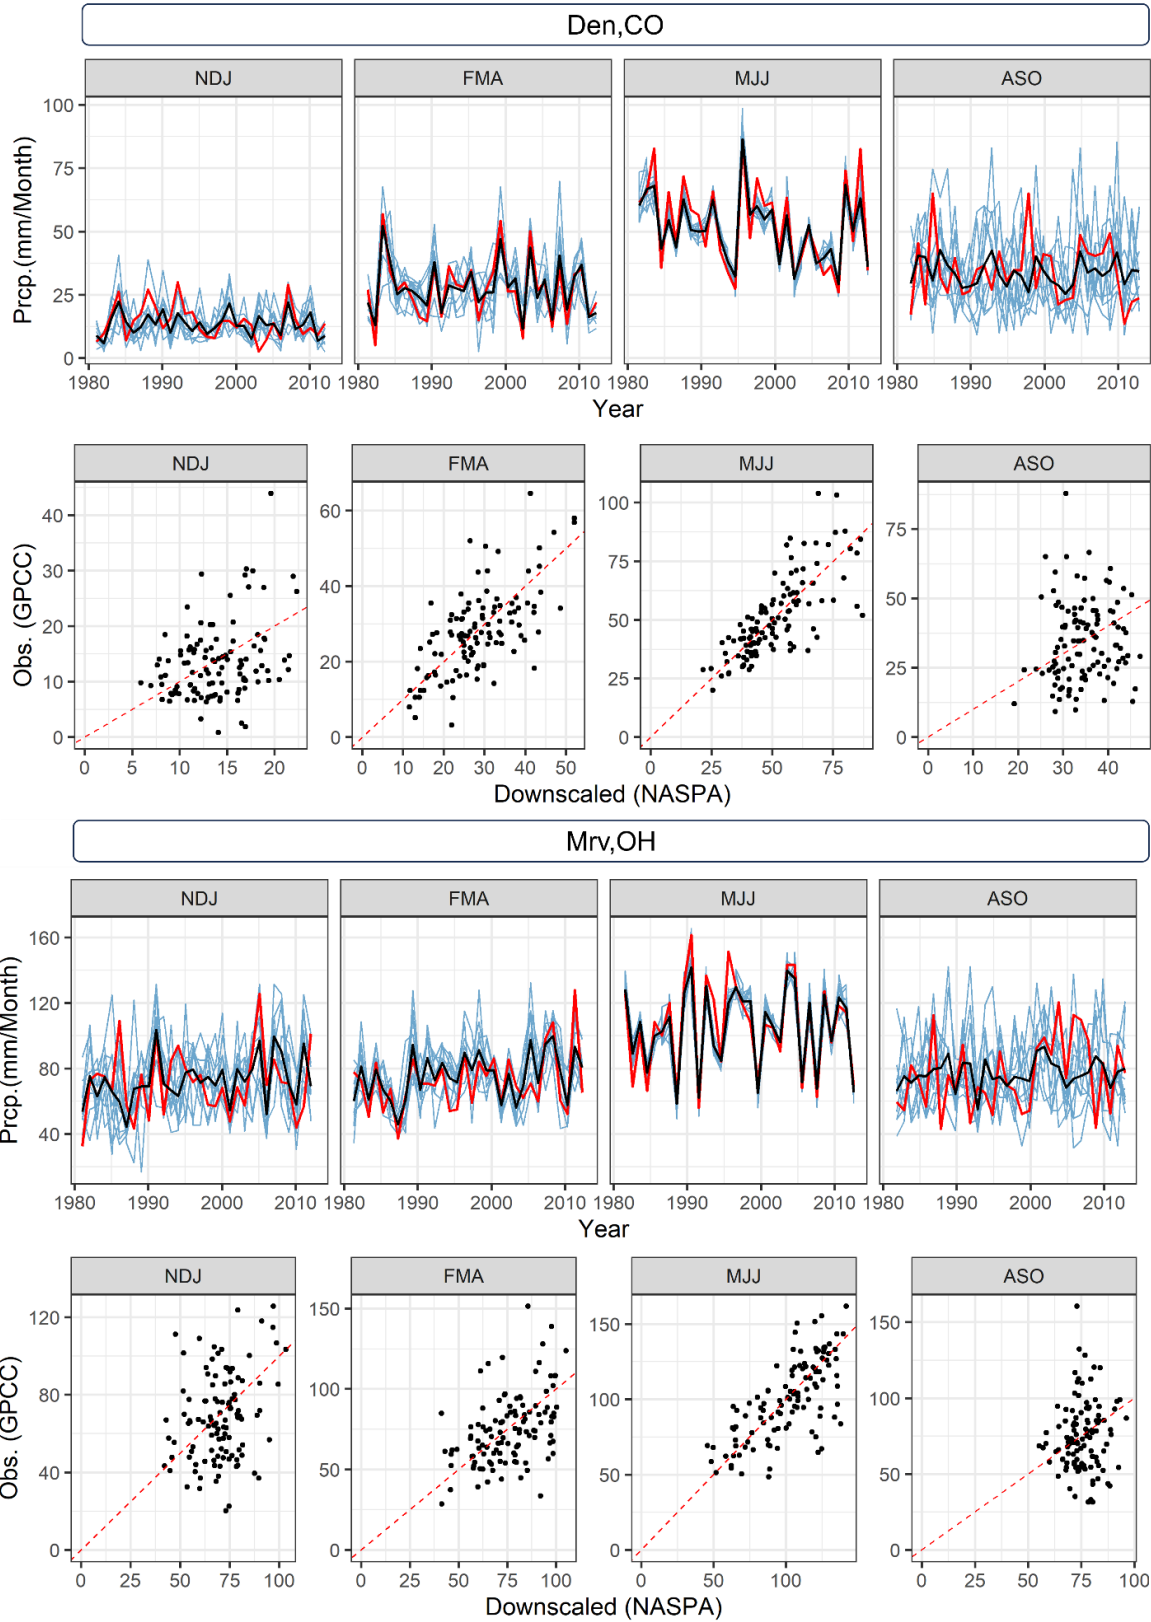

Figure S 3 (Continue). (upper) Compare the precipitation time series of GPCC (red), downscaled NASPA (black) and its nearest neighbors(sky), (lower) GPCC VS downscaled NASPA

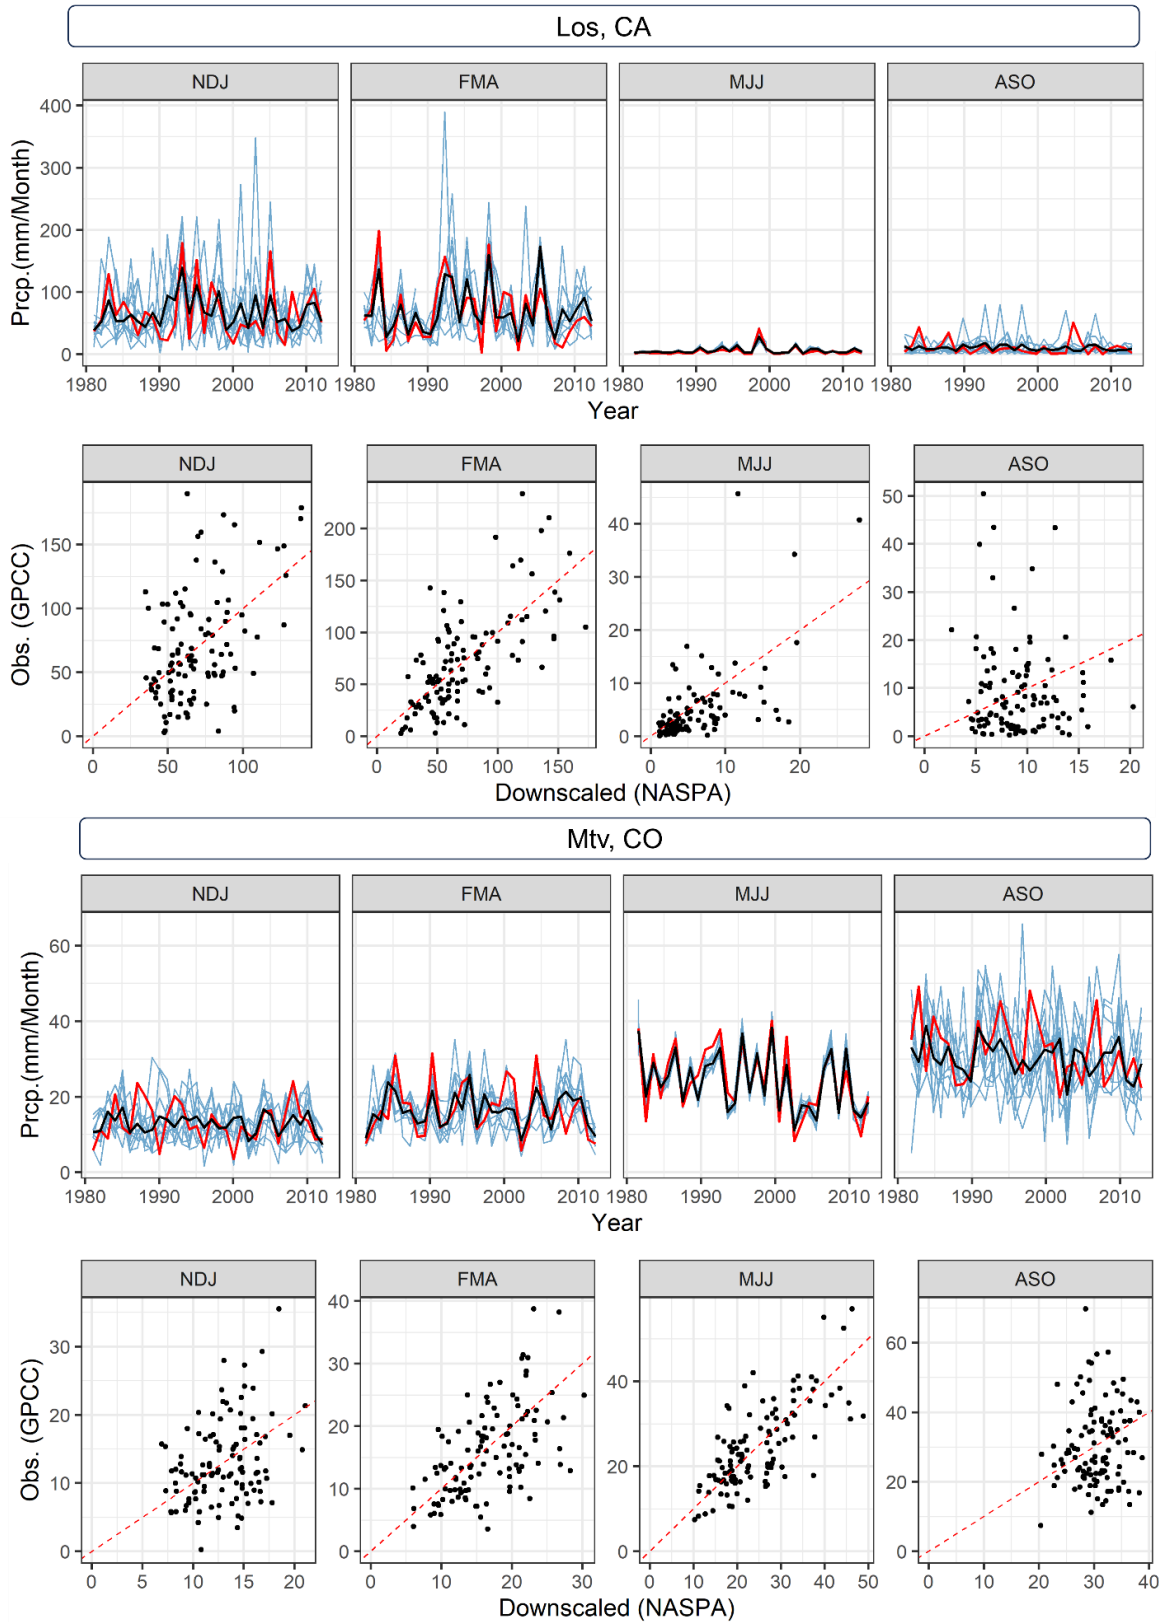

Figure S 3 (Continue). (upper) Compare the precipitation time series of GPCC (red), downscaled NASPA (black) and its nearest neighbors(sky), (lower) GPCC VS downscaled NASPA



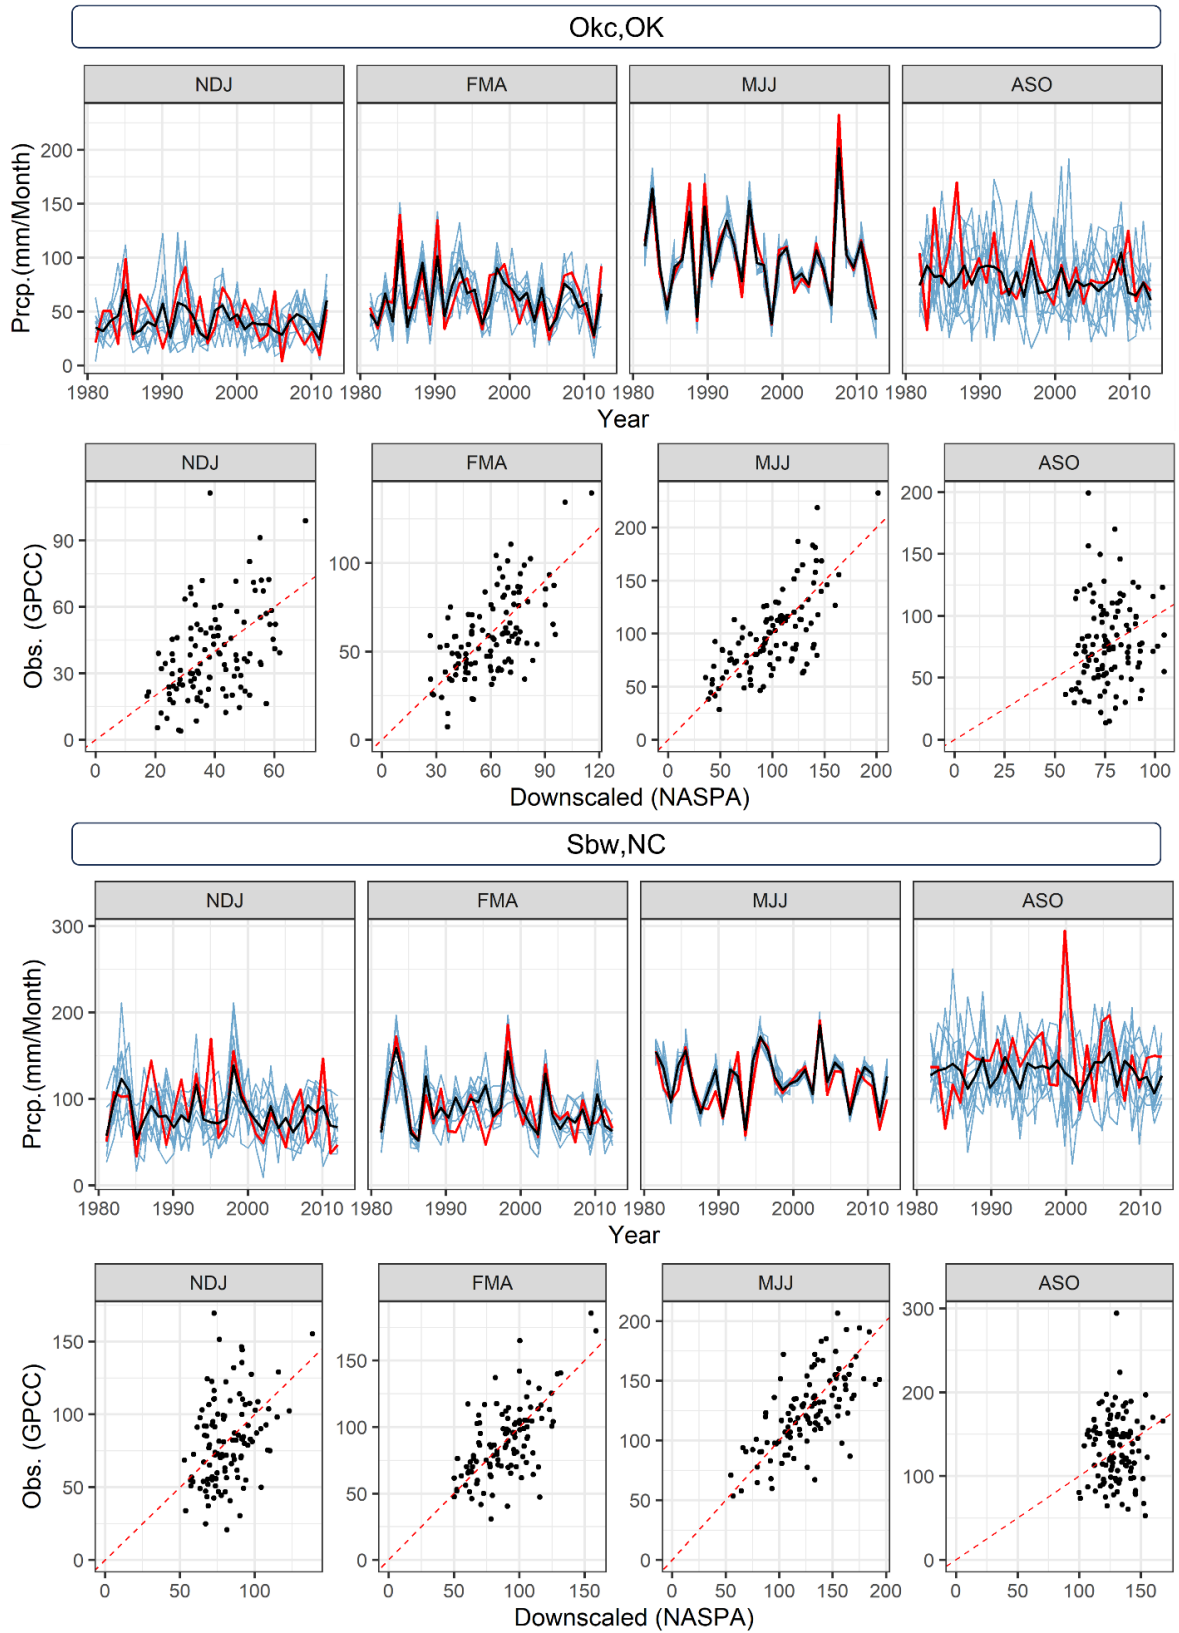

Figure S 3 (Continue). (upper) Compare the precipitation time series of GPCC (red), downscaled NASPA (black) and its nearest neighbors (sky), (lower) GPCC VS downscaled NASPA

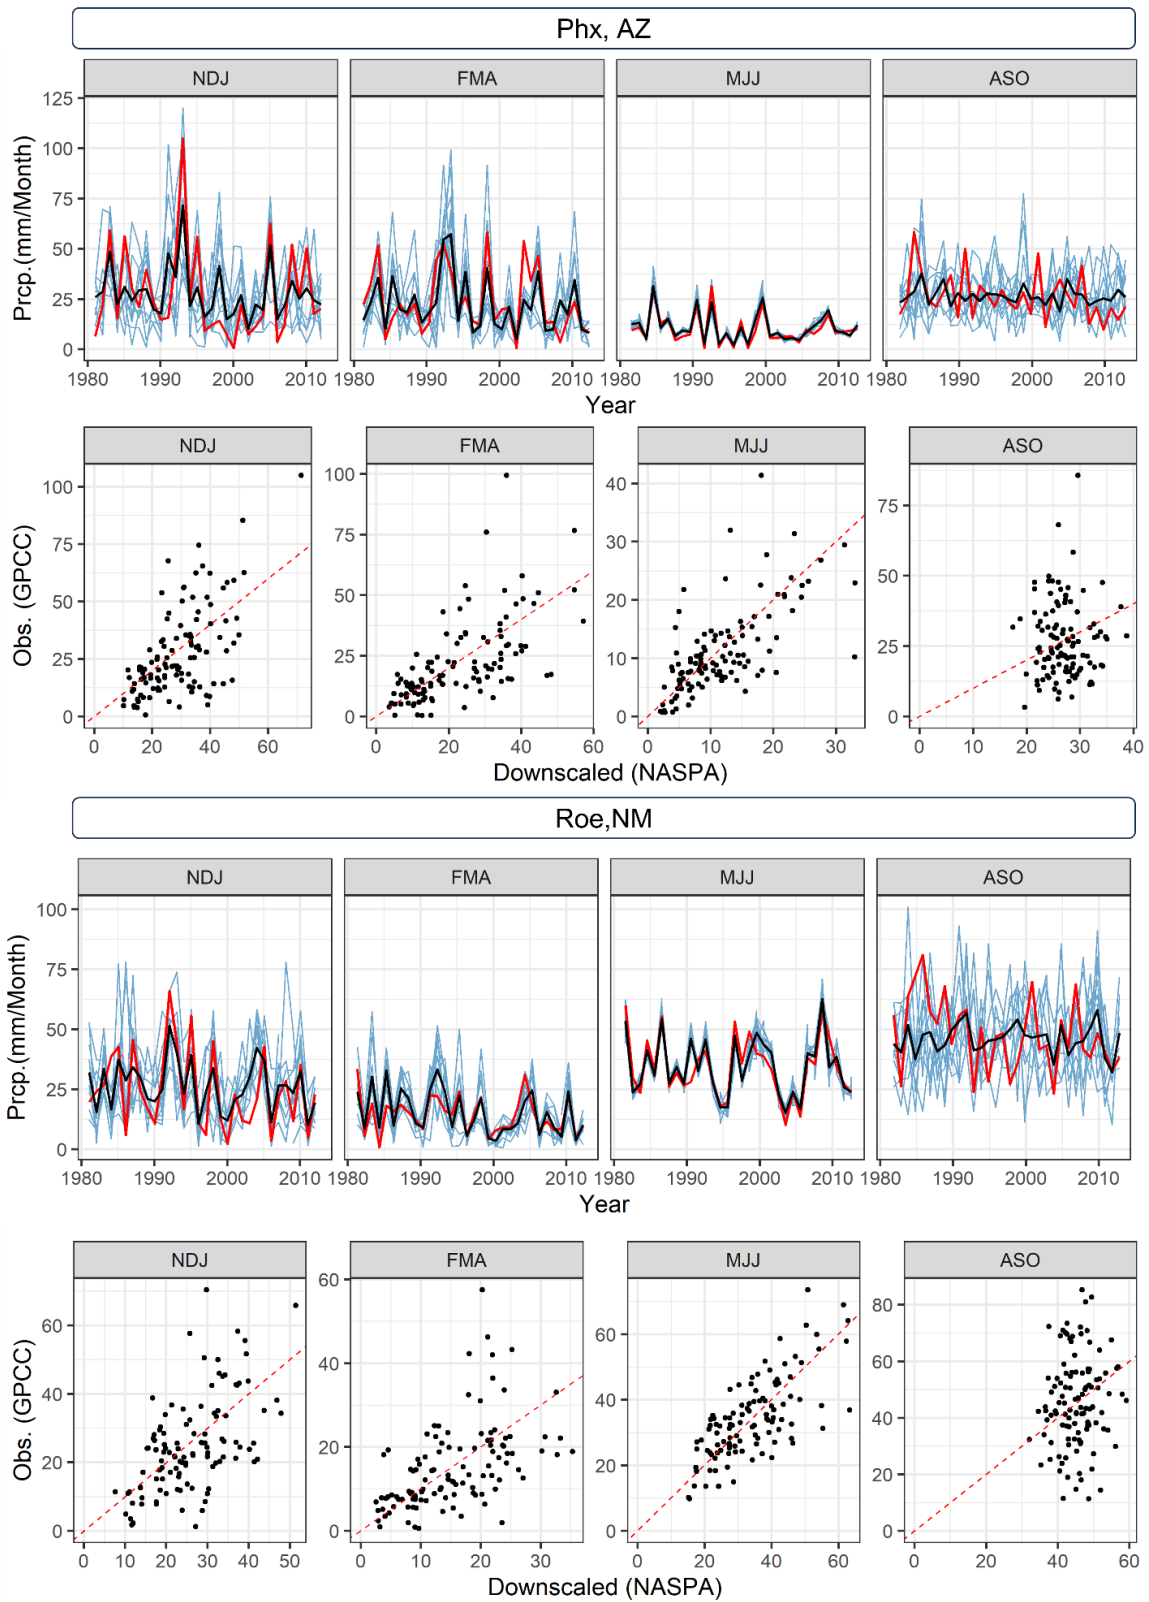

Figure S 3 (Continue). (upper) Compare the precipitation time series of GPCC (red), downscaled NASPA (black) and its nearest neighbors(sky), (lower) GPCC VS downscaled NASA

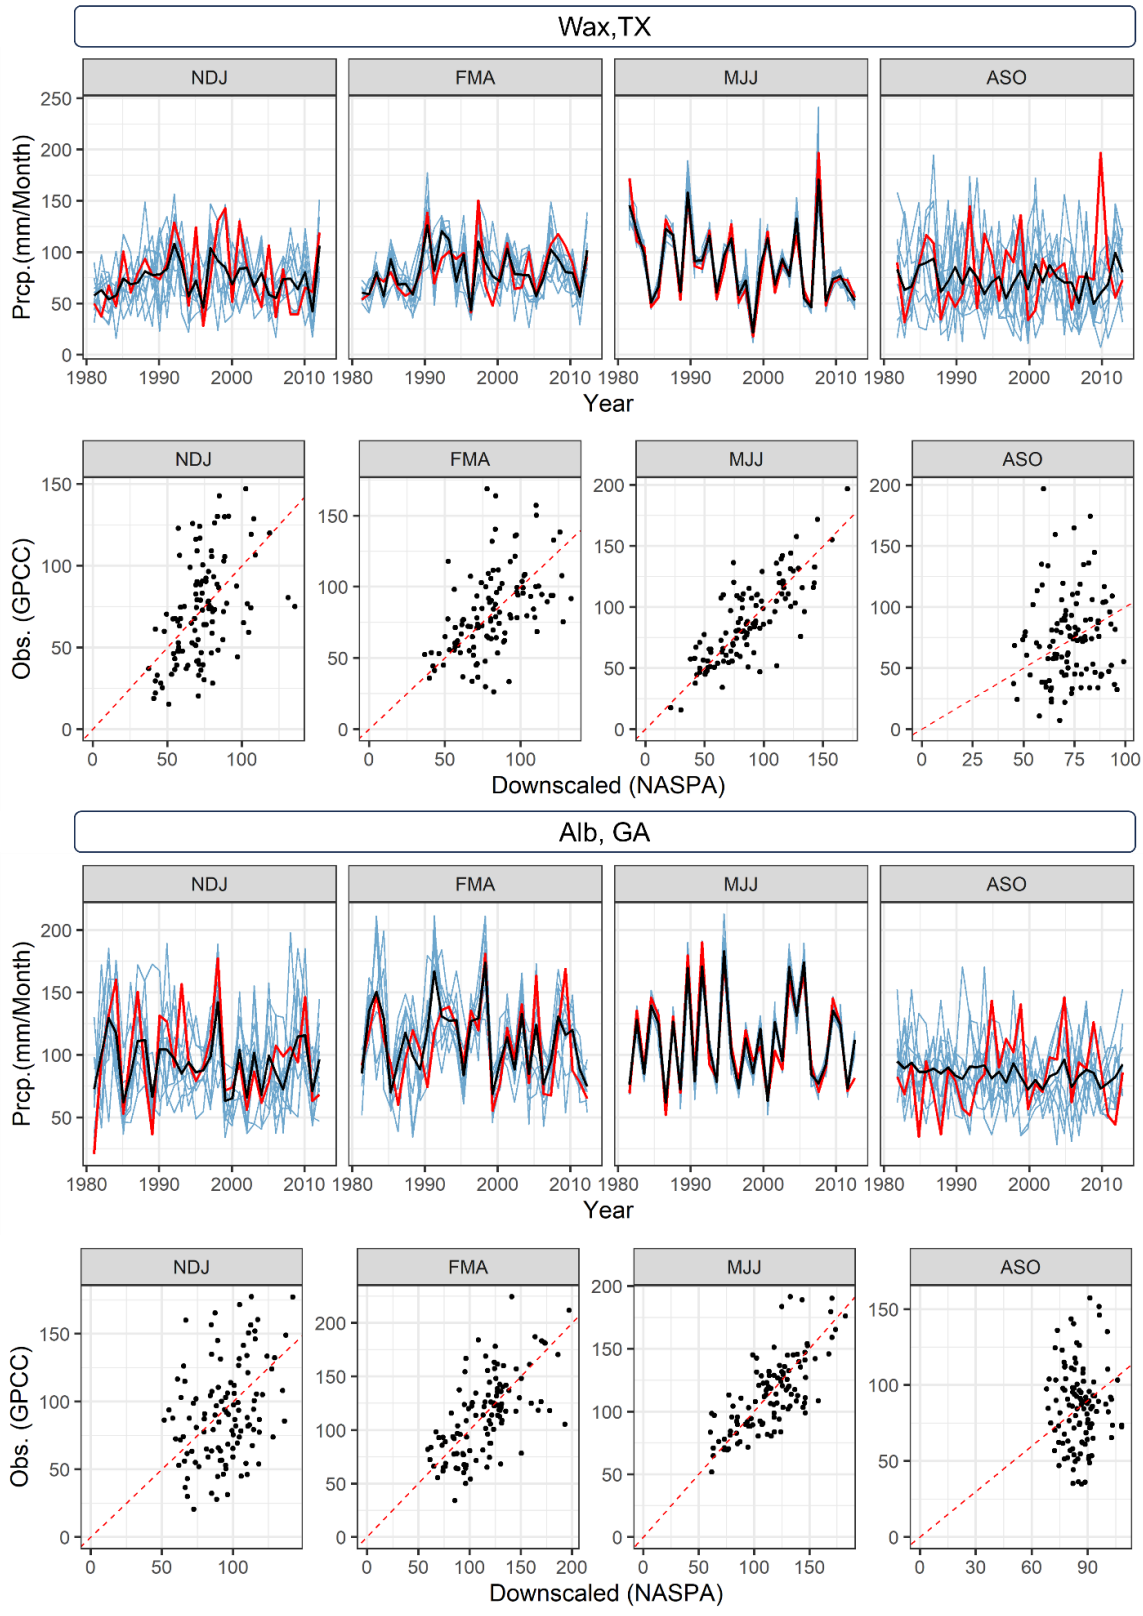

Figure S 3 (Continue). (upper) Compare the precipitation time series of GPCC (red), downscaled NASPA (black) and its nearest neighbors(sky), (lower) GPCC VS downscaled NASPA

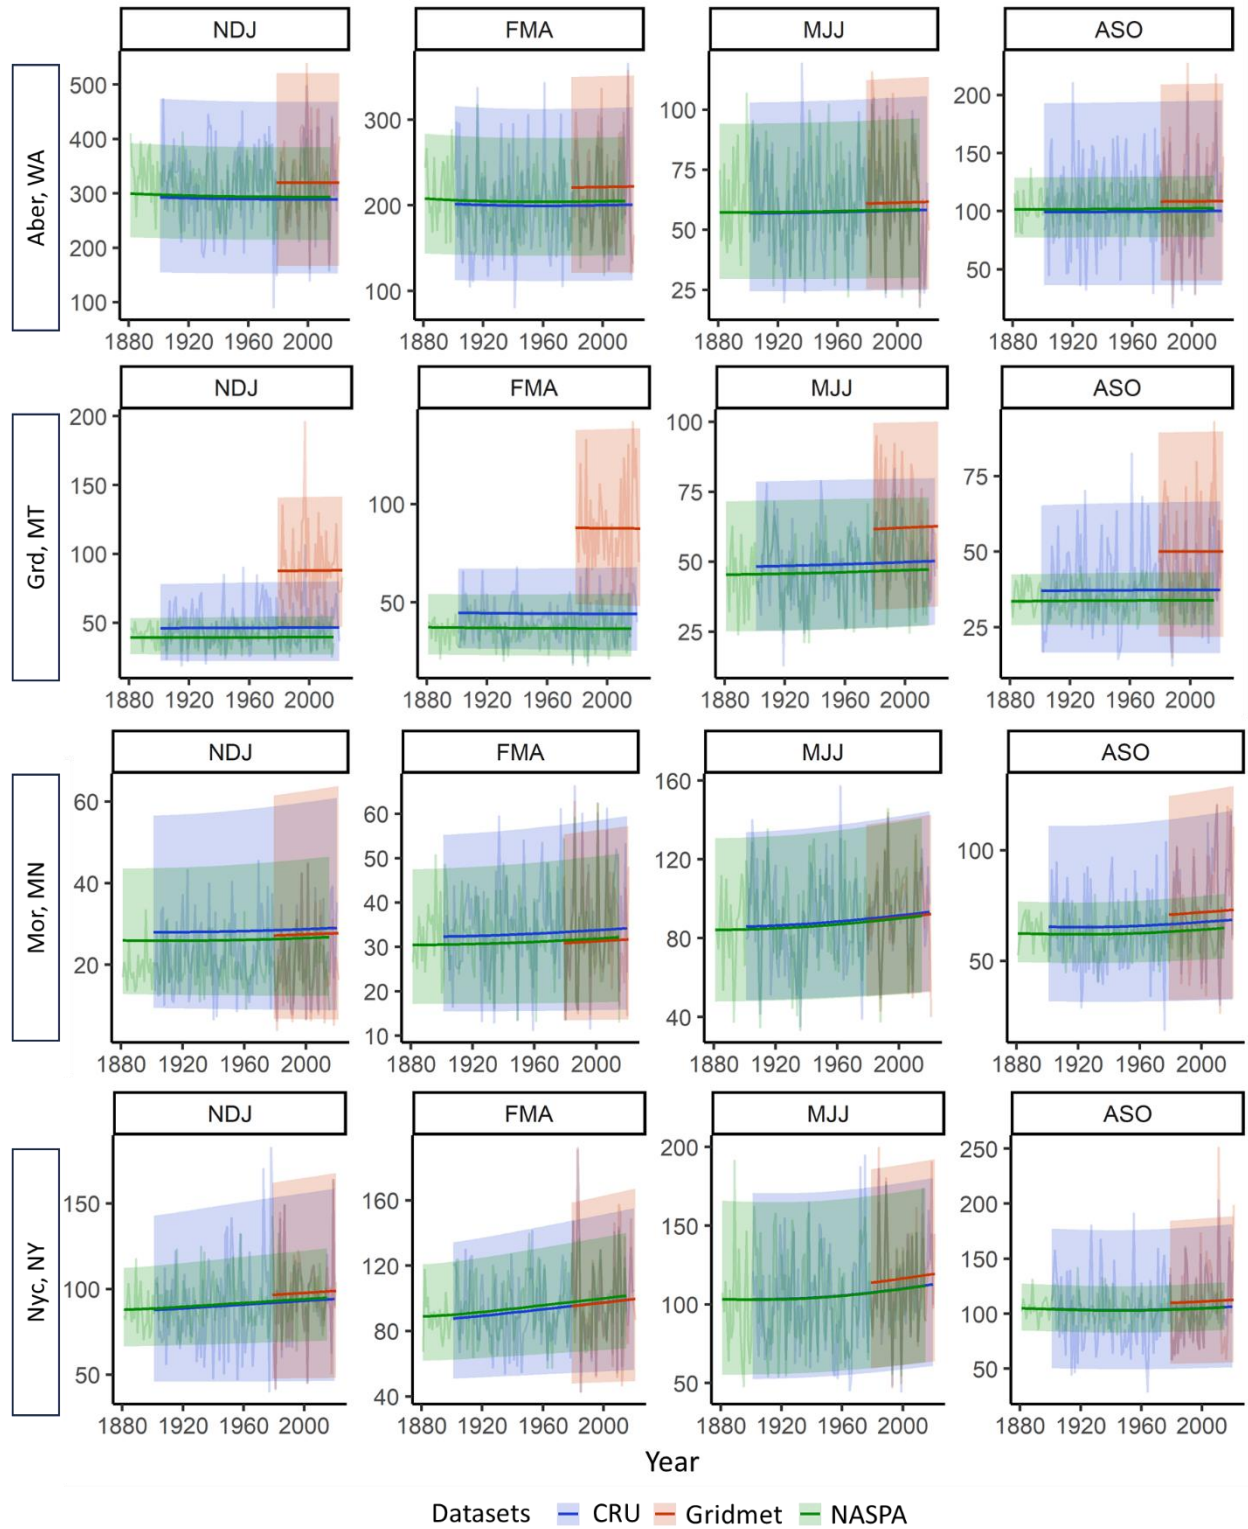

Figure S 4. Modeled mean, drought and pluvials anomaly (SPI = -1.5 and +1.5, marked shaded area)

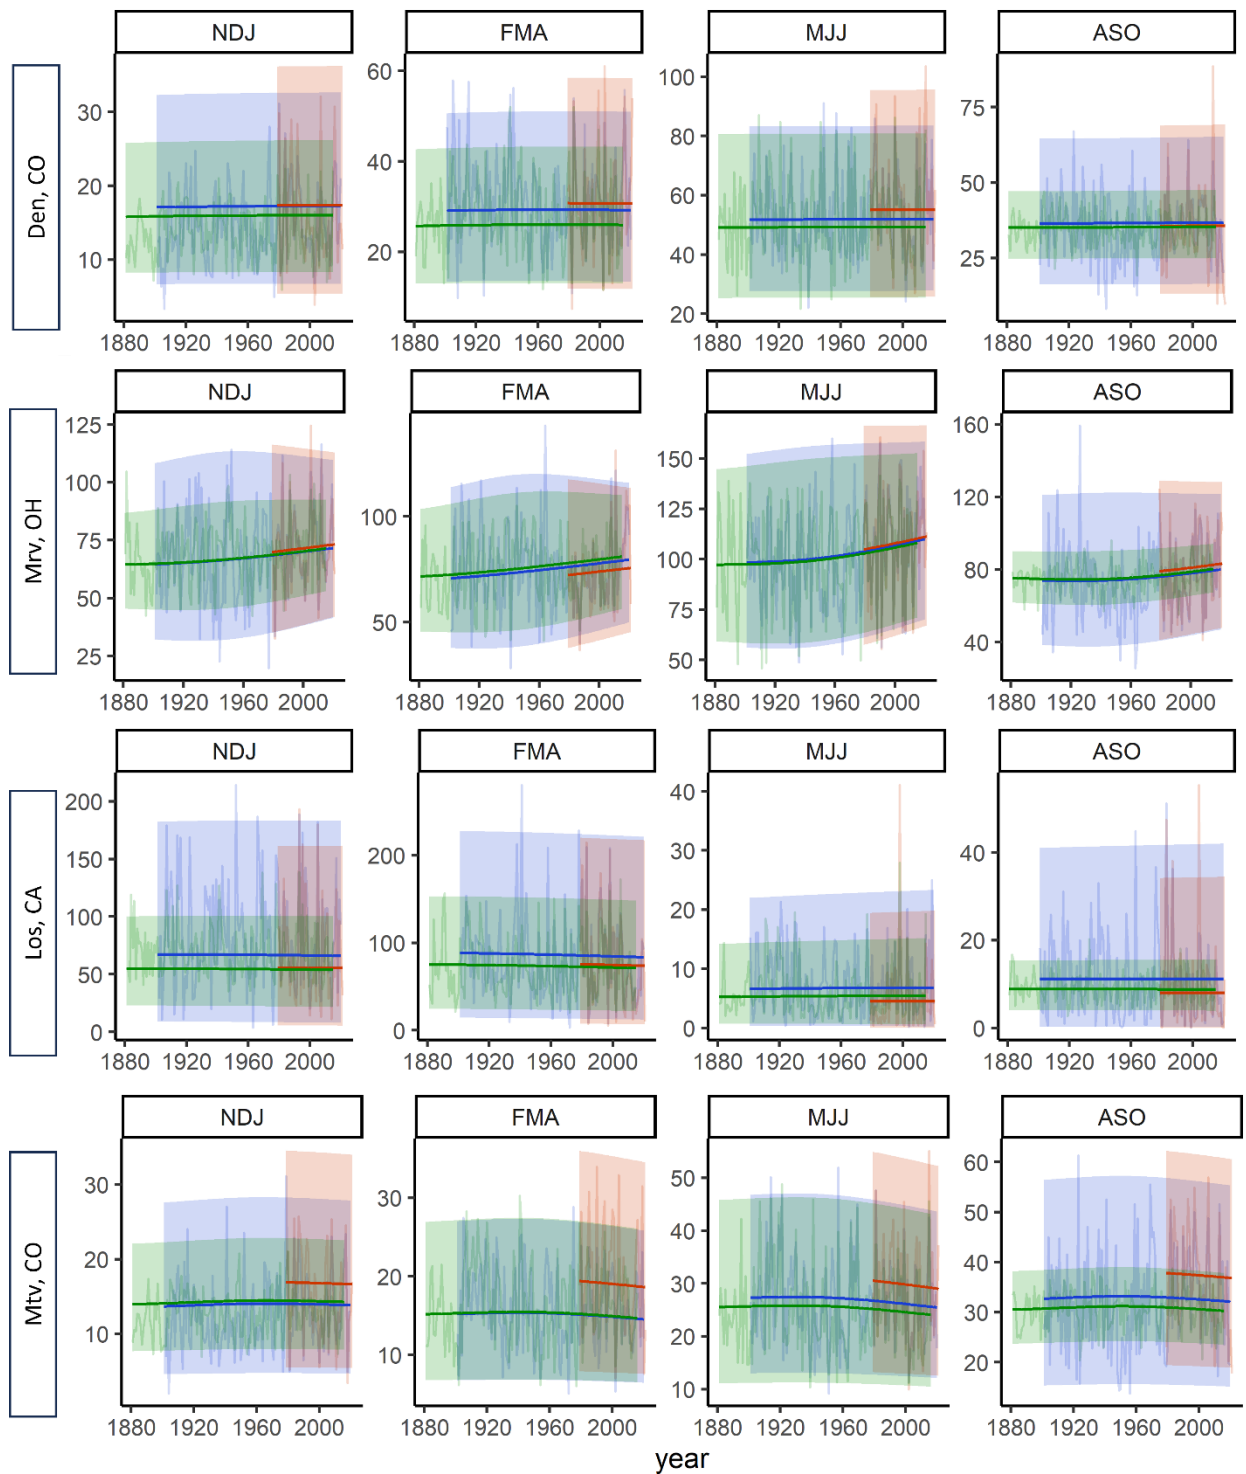

Figure S 4 (Continue). Modeled bias in average precipitation in each dataset

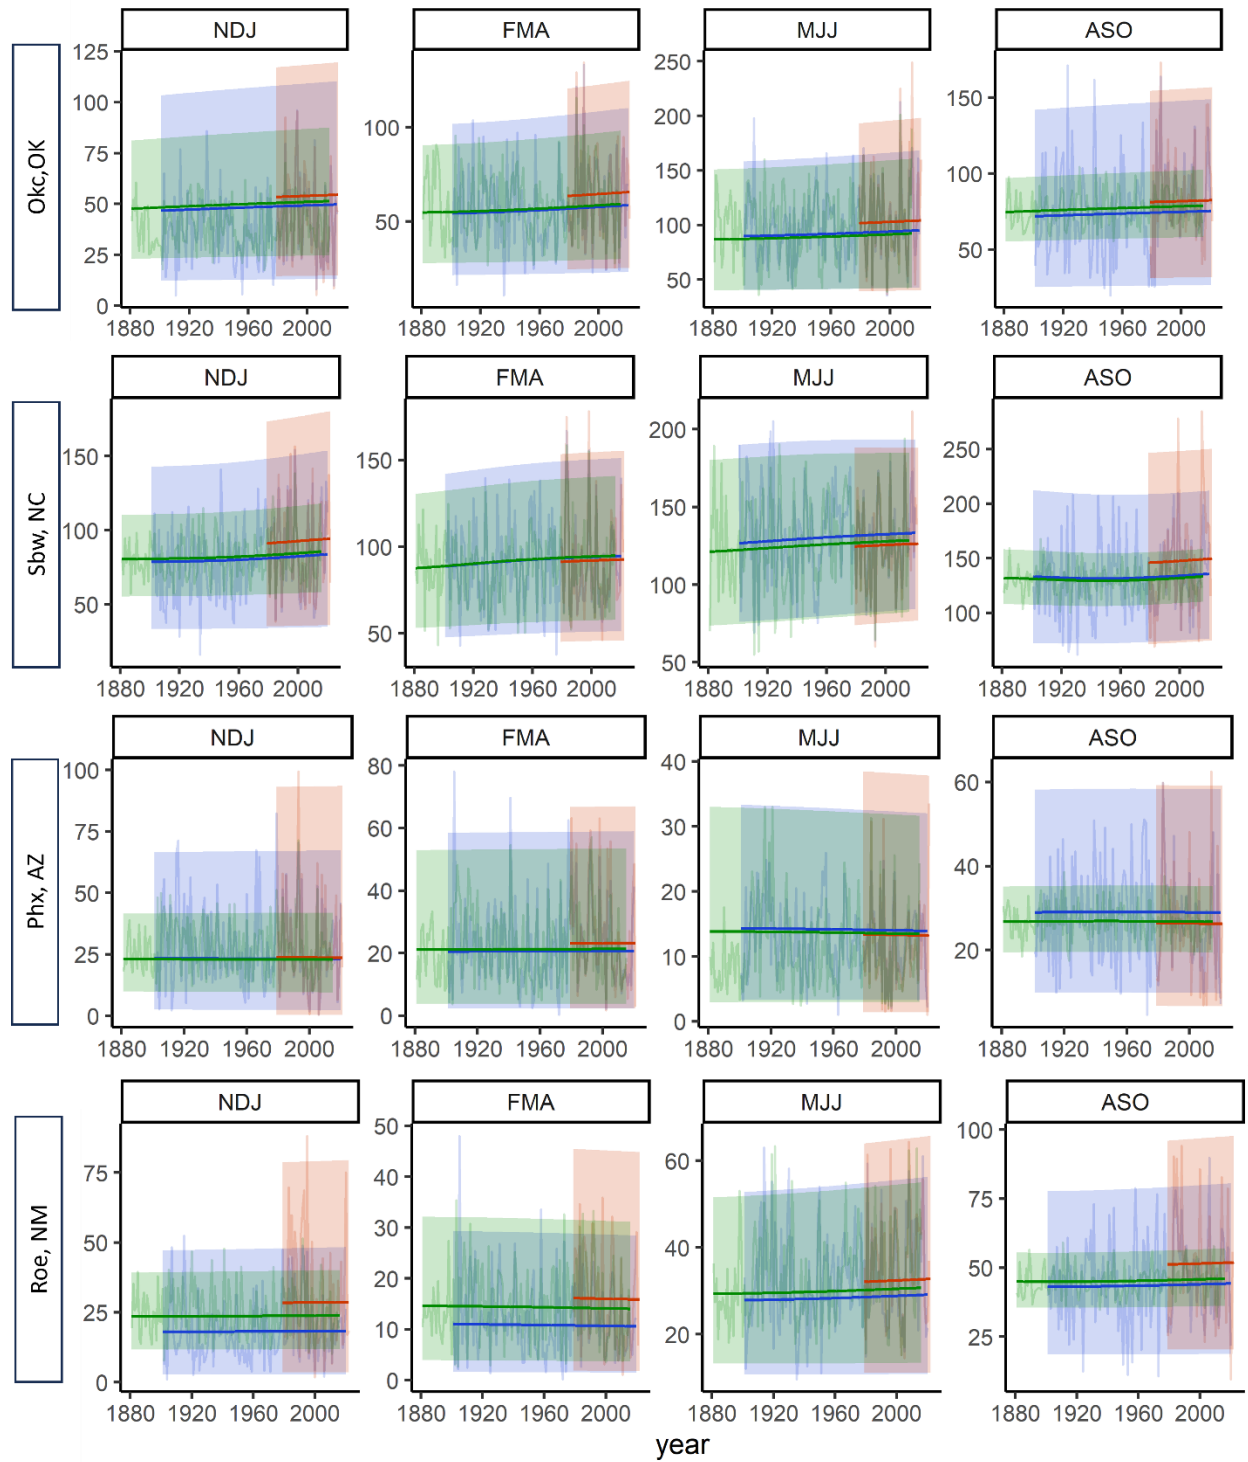

Figure S 4 (Continue). Modeled bias in average precipitation in each dataset

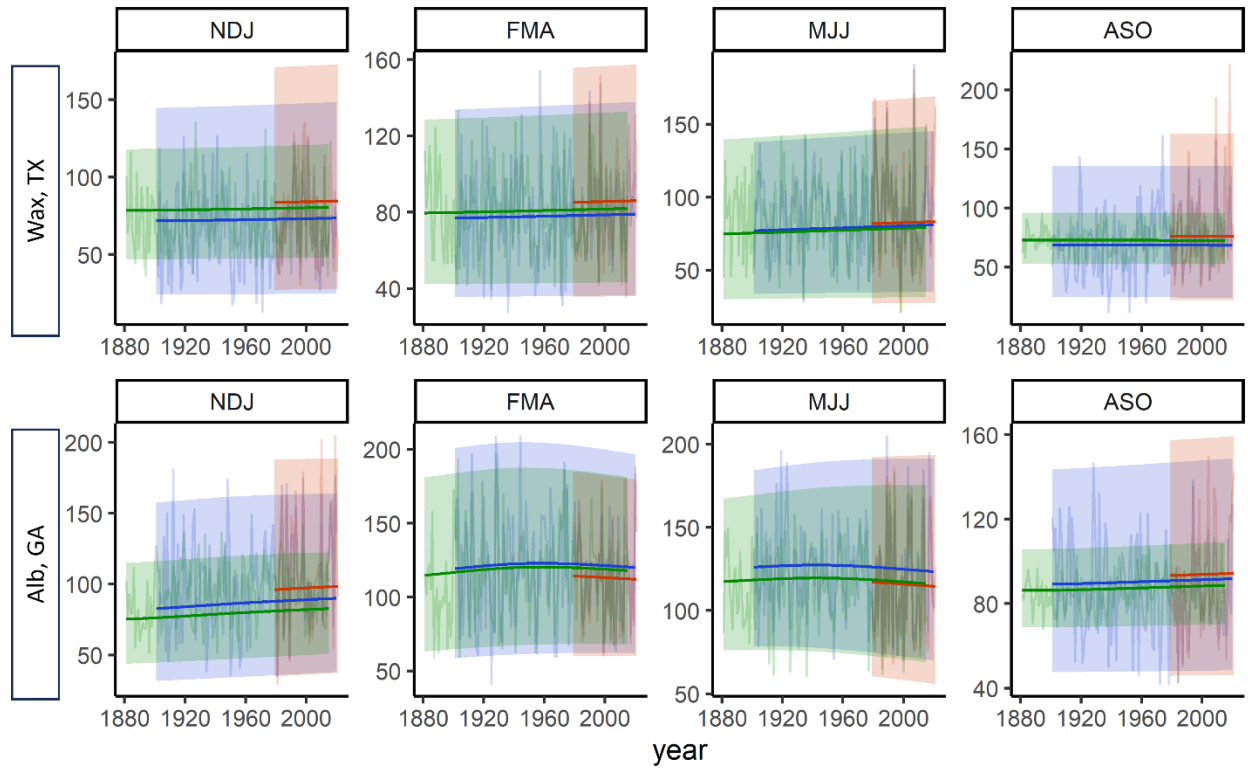

Figure S 4 (Continue). Modeled bias in average precipitation in each dataset

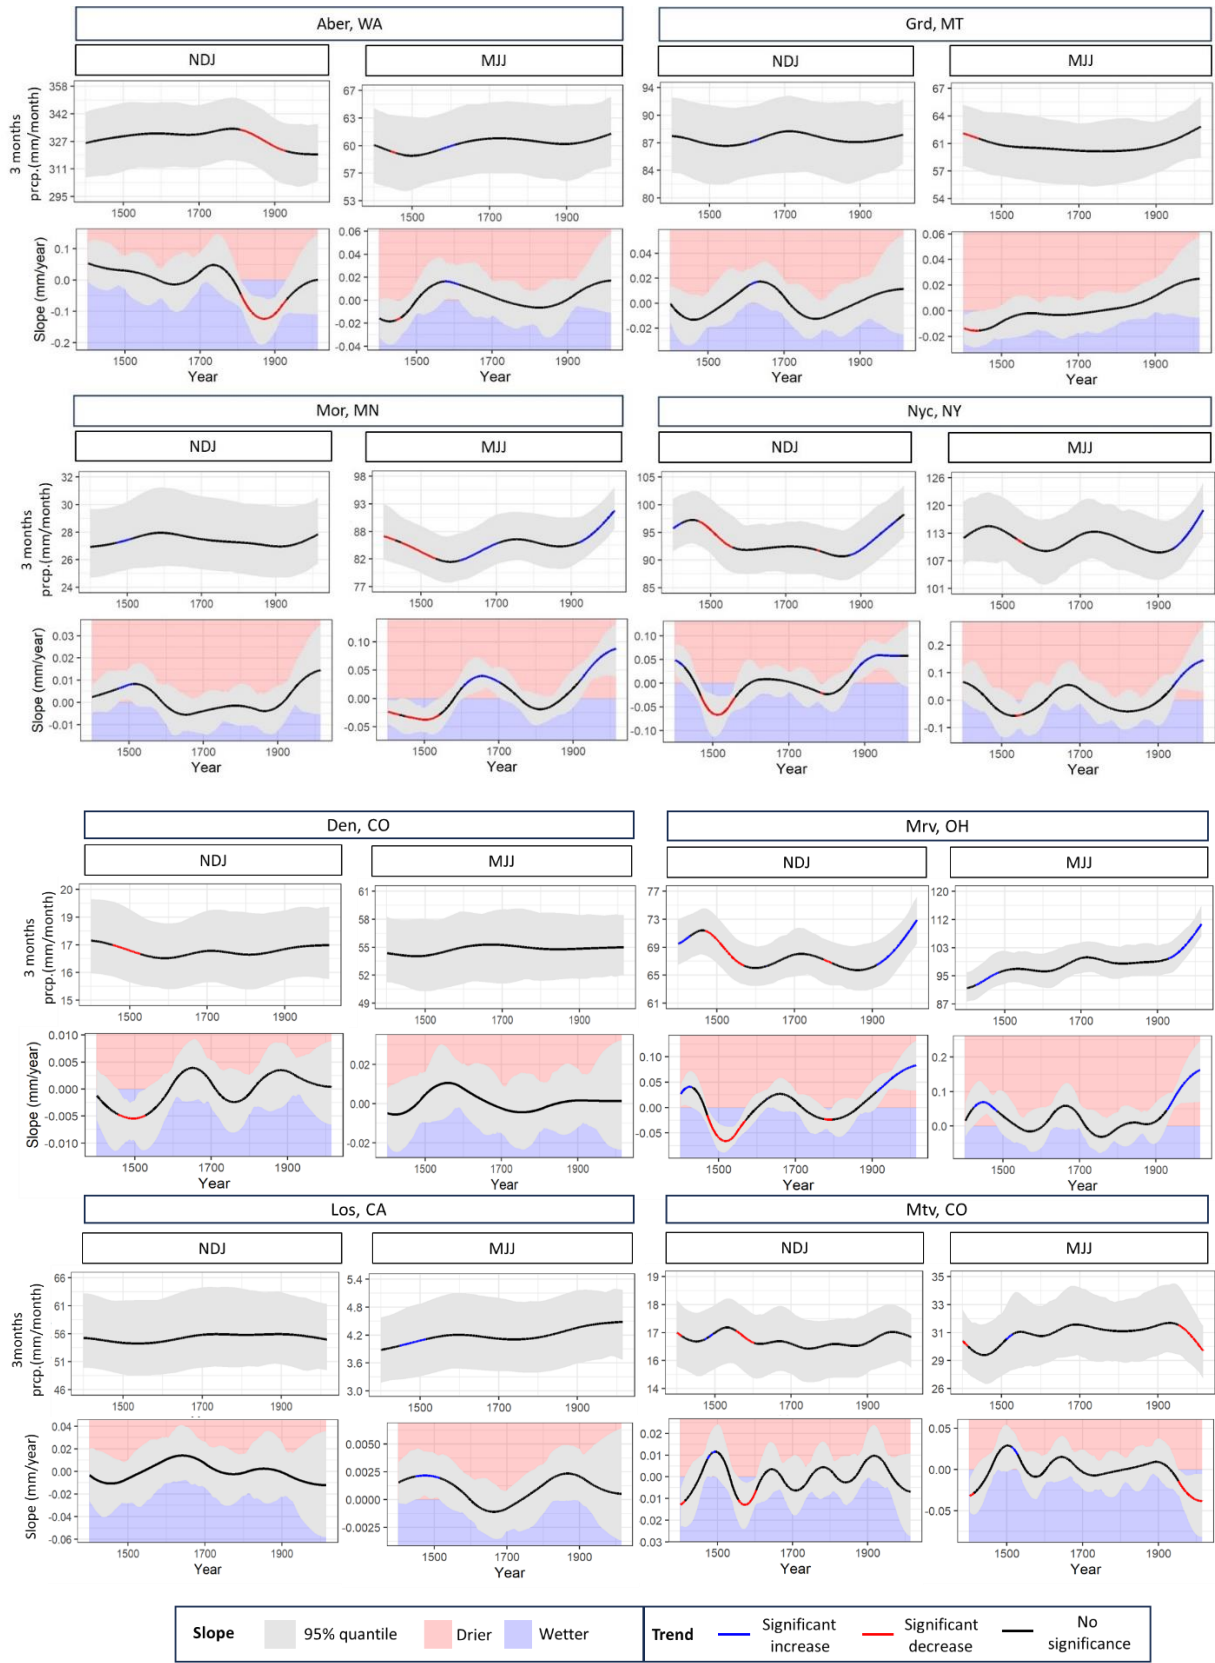

Figure S 5. Modeled mean trends marked the periods experiencing significant changes (upper), the first derivatives of modeled mean (lower).



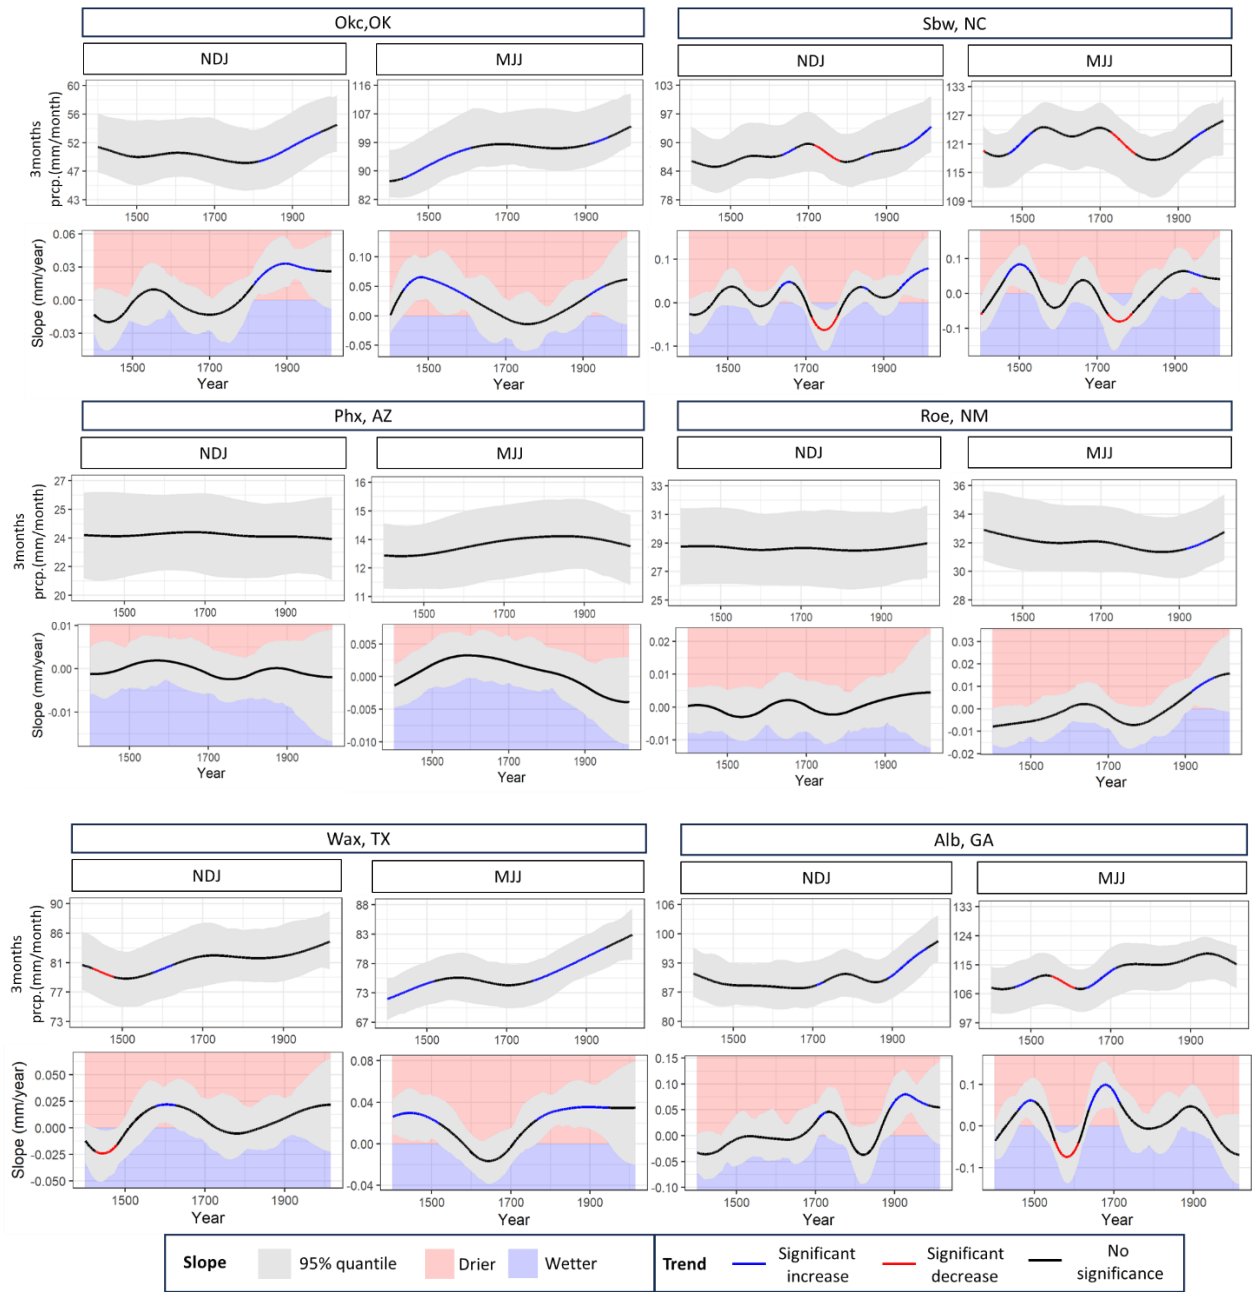

Figure S 5 (Continue). Modeled mean trends marked the periods experiencing significant changes (upper), the first derivatives of modeled mean (lower).
